# Supplementary material
Source: publisher site journal article supplement (http://kjim.org/upload/media/kjim-2020-629-suppl1.pdf)
Supplement: Supplementary file 1 [file kjim-2020-629-suppl1.pdf]

**Supplementary Table 1. Characteristics of the comorbidities and medication use at baseline**

| Variable                                                          | With incident diabetes | Without incident diabetes | <i>p</i> value |
|-------------------------------------------------------------------|------------------------|---------------------------|----------------|
| No. of participants                                               | 177                    | 1,638                     |                |
| <b>Comorbidities</b>                                              |                        |                           |                |
| Hypertension                                                      | 95                     | 740                       | 0.03           |
| Dyslipidemia                                                      | 82                     | 648                       | 0.08           |
| Chronic lung disease                                              | 26                     | 212                       | 0.51           |
| Cardiovascular disease                                            | 28                     | 209                       | 0.23           |
| Kidney disease                                                    | 12                     | 99                        | 0.69           |
| Arthritis                                                         | 69                     | 634                       | 0.91           |
| <b>Medication use for the following comorbidities<sup>a</sup></b> |                        |                           |                |
| Hypertension <sup>b</sup>                                         | 50                     | 329                       | 0.01           |
| Dyslipidemia <sup>b</sup>                                         | 11                     | 74                        | 0.31           |
| Chronic lung disease <sup>b</sup>                                 | 15                     | 150                       | 0.76           |
| Cardiovascular disease <sup>b</sup>                               | 19                     | 142                       | 0.36           |
| Kidney disease <sup>b</sup>                                       | 5                      | 55                        | 0.71           |
| Arthritis <sup>b</sup>                                            | 35                     | 297                       | 0.59           |

<sup>a</sup>The information was collected by using the questionnaire of "Do you take Chinese traditional medicine or Western modern medicine to treat or control the disease of ...?"

<sup>b</sup>Categories of the drugs used were not specified in the China Health and Retirement Longitudinal Study.
